# Supplementary material for: Economic Returns from Cereal and Cereal/Vetch Forage Crops Grown as Fodder Conservation Options for Beef and Sheepmeat Production
Source: MDPI journal article supplement (doi:10.3390/agriculture11070664), 2021-07-14
Supplement: s1 [file s1]

**Table S1.** Predicted dry matter intake (DMI: kg/day) and liveweight change (LWC: g/day) for crossbred (Border Leicester x Merino or Dorset x Merino) castrated male lambs initially 30kg and 6 months old fed cereal and cereal/vetch forages grown in New South Wales, Australia at Wagga Wagga in 2008, Culcairn in 2009, Temora in 2010 and Coolamon in 2011.

| Cereal Variety | Harvest | Cereal crops |     |   |          |     |   |        |     |   |          |     |   | Cereal/vetch crops |     |   |          |     |   |        |     |  |          |     |   |
|----------------|---------|--------------|-----|---|----------|-----|---|--------|-----|---|----------|-----|---|--------------------|-----|---|----------|-----|---|--------|-----|--|----------|-----|---|
|                |         | Wagga Wagga  |     |   | Culcairn |     |   | Temora |     |   | Coolamon |     |   | Wagga Wagga        |     |   | Culcairn |     |   | Temora |     |  | Coolamon |     |   |
|                |         | DMI          | LWC |   | DMI      | LWC |   | DMI    | LWC |   | DMI      | LWC |   | DMI                | LWC |   | DMI      | LWC |   | DMI    | LWC |  | DMI      | LWC |   |
| Echidna        | 1       | 1.3          | 242 | * | 0.9      | 107 | * | 1.2    | 73  | * | 1.1      | 181 | * | 1.5                | 273 | * | 1.6      | 252 | * | 1.3    | 90  |  | 1.4      | 180 | * |
| Mannus         | 1       | 1.4          | 250 | * | 0.9      | 124 | * | 1.2    | 135 | * | 1.2      | 200 | * | 1.7                | 319 | * | 1.7      | 306 | * | 1.4    | 147 |  | 1.5      | 184 | * |
| Gairdner       | 1       | 1.6          | 307 | * | 0.9      | 139 | * | 1.3    | 84  |   | 1.3      | 257 | * | 1.6                | 319 | * | 1.7      | 258 |   | 1.4    | 140 |  | 1.6      | 245 | * |
| Urambie        | 1       | 1.7          | 335 | * | 0.9      | 146 | * | 1.5    | 212 | * | 1.2      | 234 | * | 1.7                | 338 | * | 1.7      | 270 |   | 1.5    | 163 |  | 1.5      | 220 | * |
| Wedgetail      | 1       | 1.6          | 323 | * | 0.8      | 114 | * | 1.4    | 147 | * | 1.2      | 213 | * | 1.8                | 382 | * | 1.6      | 222 |   | 1.4    | 111 |  | 1.5      | 216 | * |
| Strzelecki     | 1       | 1.3          | 255 | * | 1.0      | 165 | * | 1.3    | 116 | * | 1.2      | 207 | * | 1.6                | 319 | * | 1.6      | 204 |   | 1.4    | 118 |  | 1.5      | 198 | * |
| Tobruk         | 1       | 1.3          | 227 | * | 0.9      | 102 | * | 1.3    | 118 | * | 1.3      | 219 | * | 1.7                | 320 | * | 1.6      | 229 |   | 1.4    | 132 |  | 1.5      | 191 | * |
| Echidna        | 2       | 1.2          | 165 | * | 0.8      | 74  | * | 1.0    | 26  | * | 1.1      | 139 | * | 1.4                | 209 | * | 1.2      | 155 | * | 1.3    | 96  |  | 1.3      | 137 | * |
| Mannus         | 2       | 1.2          | 132 | * | 0.8      | 73  | * | 1.1    | 59  | * | 1.0      | 98  | * | 1.5                | 210 | * | 1.6      | 231 |   | 1.3    | 108 |  | 1.2      | 110 | * |
| Gairdner       | 2       | 1.3          | 223 | * | 0.8      | 89  | * | 1.2    | 60  | * | 1.1      | 159 | * | 1.4                | 212 | * | 1.6      | 207 |   | 1.3    | 80  |  | 1.2      | 151 | * |
| Urambie        | 2       | 1.3          | 207 | * | 0.8      | 94  | * | 1.3    | 113 | * | 1.2      | 163 | * | 1.4                | 222 | * | 1.6      | 241 |   | 1.3    | 104 |  | 1.3      | 156 | * |
| Wedgetail      | 2       | 1.4          | 251 | * | 0.9      | 107 | * | 1.3    | 88  | * |          |     |   | 1.3                | 228 | * | 1.6      | 207 |   | 1.3    | 92  |  |          |     |   |
| Strzelecki     | 2       | 1.3          | 175 | * | 0.9      | 110 | * | 1.2    | 83  | * |          | nc  |   | 1.5                | 229 | * | 1.5      | 188 |   | 1.4    | 112 |  |          | nc  |   |
| Tobruk         | 2       | 1.2          | 169 | * | 0.7      | 38  | * | 1.0    | 7   | * | 1.1      | 138 | * | 1.6                | 232 | * | 1.6      | 252 | * | 1.4    | 120 |  | 1.4      | 141 | * |
| Echidna        | 3       | 1.2          | 164 | * | 0.8      | 65  | * | 1.0    | 7   | * | 1.1      | 95  | * | 1.2                | 132 | * | 1.5      | 198 | * | 1.2    | 56  |  | 1.4      | 130 | * |
| Mannus         | 3       | 1.2          | 103 | * | 0.7      | 38  | * | 1.0    | 29  | * | 1.1      | 97  | * | 1.4                | 161 | * | 1.4      | 191 | * | 1.2    | 71  |  | 1.3      | 110 |   |
| Gairdner       | 3       | 1.2          | 185 | * | 0.8      | 71  | * | 1.1    | 43  |   | 1.1      | 111 | * | 1.3                | 169 | * | 1.5      | 216 | * | 1.4    | 111 |  | 1.4      | 151 | * |
| Urambie        | 3       | 1.4          | 221 | * | 0.8      | 85  | * | 0.9    | 74  | * | 1.1      | 103 | * | 1.5                | 238 | * | 1.6      | 226 |   | 1.2    | 62  |  | 1.4      | 141 | * |
| Wedgetail      | 3       | 1.3          | 207 | * | 0.8      | 49  | * | 1.0    | 50  | * | 1.1      | 119 | * | 1.3                | 197 | * | 1.4      | 147 | * | 1.2    | 71  |  | 1.4      | 158 | * |
| Strzelecki     | 3       | 1.2          | 164 | * | 0.8      | 48  | * | 1.0    | 36  | * | 0.9      | 58  | * | 1.4                | 187 | * | 1.5      | 167 |   | 1.3    | 94  |  | 1.3      | 122 | * |
| Tobruk         | 3       | 1.3          | 153 | * | 0.8      | 27  | * | 0.9    | 12  | * | 1.0      | 74  | * | 1.5                | 203 | * | 1.4      | 150 |   | 1.2    | 77  |  | 1.3      | 108 | * |
| Echidna        | 4       |              |     |   | 0.7      | -3  | * | 0.9    | -22 | * | 1.0      | 48  | * |                    |     |   | 1.4      | 145 |   | 1.0    | 13  |  |          |     |   |
| Mannus         | 4       |              |     |   | 0.7      | 21  | * | 0.9    | -37 | * | 1.0      | 30  | * |                    |     |   | 1.4      | 151 | * | 1.2    | 66  |  |          |     |   |
| Gairdner       | 4       |              |     |   | 0.7      | 43  | * | 1.0    | 13  | * | 0.9      | 45  | * |                    |     |   | 1.5      | 167 |   | 1.2    | 49  |  |          |     |   |
| Urambie        | 4       |              | nc  |   | 0.8      | 69  | * | 0.9    | 53  | * | 0.8      | 19  | * |                    | nc  |   | 1.5      | 174 |   | 1.3    | 101 |  |          | nc  |   |
| Wedgetail      | 4       |              |     |   | 0.8      | 46  | * | 0.9    | 30  | * | 1.1      | 69  | * |                    |     |   |          | nc  |   |        |     |  |          |     |   |
| Strzelecki     | 4       |              |     |   | 0.8      | 63  | * | 0.9    | 30  | * | 0.8      | 7   | * |                    |     |   | 1.4      | 141 |   |        | nc  |  |          |     |   |
| Tobruk         | 4       |              |     |   | 0.7      | 23  | * | 0.8    | 13  | * |          | nc  |   |                    |     |   |          | nc  |   |        |     |  |          |     |   |

nc = not cut at this harvest due to lodging or early senescence caused by moisture stress. \* Inadequate crude protein content for the level of available metabolisable energy.

**Table S2.** Predicted dry matter intake (DMI) and liveweight change (LWC) for British breed steers initially 300kg and 12 months old fed cereal and cereal/vetch forages grown in New South Wales, Australia at Wagga Wagga in 2008, Culcairn in 2009, Temora in 2010 and Coolamon in 2011.

| Cereal<br>Variety | Harvest | Cereal crops |      |   |          |       |   |        |       |   |          |       |   | Cereal/vetch crops |      |   |          |      |   |        |       |  |          |      |   |
|-------------------|---------|--------------|------|---|----------|-------|---|--------|-------|---|----------|-------|---|--------------------|------|---|----------|------|---|--------|-------|--|----------|------|---|
|                   |         | Wagga Wagga  |      |   | Culcairn |       |   | Temora |       |   | Coolamon |       |   | Wagga Wagga        |      |   | Culcairn |      |   | Temora |       |  | Coolamon |      |   |
|                   |         | DMI          | LWC  |   | DMI      | LWC   |   | DMI    | LWC   |   | DMI      | LWC   |   | DMI                | LWC  |   | DMI      | LWC  |   | DMI    | LWC   |  | DMI      | LWC  |   |
| Echidna           | 1       | 8.4          | 1.74 | * | 5.6      | 0.68  | * | 7.8    | 0.51  | * | 7.3      | 1.28  | * | 9.8                | 1.94 | * | 10.4     | 1.82 |   | 8.0    | 0.54  |  | 9.4      | 1.36 | * |
| Mannus            | 1       | 9.4          | 1.85 | * | 5.6      | 0.76  | * | 8.1    | 0.91  | * | 8.3      | 1.49  | * | 11.1               | 2.33 |   | 11.1     | 2.33 | * | 9.0    | 1.01  |  | 9.6      | 1.30 |   |
| Gairdner          | 1       | 10.6         | 2.31 | * | 5.6      | 0.85  | * | 7.9    | 0.51  |   | 8.4      | 1.81  | * | 10.4               | 2.30 | * | 10.5     | 1.83 |   | 8.9    | 0.95  |  | 10.4     | 1.76 |   |
| Urambie           | 1       | 11.0         | 2.47 | * | 5.6      | 0.90  | * | 9.6    | 1.51  | * | 8.1      | 1.63  | * | 10.9               | 2.48 | * | 10.6     | 1.90 |   | 9.3    | 1.12  |  | 10.0     | 1.57 |   |
| Wedgetail         | 1       | 10.4         | 2.34 | * | 5.3      | 0.74  | * | 9.0    | 1.01  |   | 7.8      | 1.56  | * | 9.7                | 2.27 |   | 10.0     | 1.55 |   | 8.5    | 0.74  |  | 10.1     | 1.64 | * |
| Strzelecki        | 1       | 8.4          | 1.78 | * | 6.9      | 1.23  | * | 8.6    | 0.82  | * | 7.8      | 1.43  | * | 10.4               | 2.30 | * | 9.8      | 1.42 |   | 8.6    | 0.79  |  | 9.8      | 1.45 | * |
| Tobruk            | 1       | 8.7          | 1.68 | * | 5.6      | 0.62  | * | 8.6    | 0.79  |   | 8.4      | 1.51  |   | 11.1               | 2.33 |   | 10.0     | 1.59 |   | 8.8    | 0.89  |  | 9.6      | 1.30 |   |
| Echidna           | 2       | 8.0          | 1.21 | * | 5.1      | 0.45  | * | 6.4    | 0.10  | * | 7.2      | 0.94  | * | 9.2                | 1.52 | * | 8.3      | 1.13 | * | 8.2    | 0.60  |  | 8.6      | 0.99 | * |
| Mannus            | 2       | 7.7          | 0.93 | * | 5.3      | 0.46  | * | 7.0    | 0.33  | * | 6.6      | 0.70  | * | 9.9                | 1.49 |   | 10.0     | 1.59 |   | 8.4    | 0.69  |  | 7.9      | 0.74 | * |
| Gairdner          | 2       | 8.8          | 1.58 | * | 5.3      | 0.59  | * | 7.5    | 0.35  |   | 7.2      | 1.08  | * | 8.8                | 1.50 | * | 9.8      | 1.42 |   | 7.9    | 0.51  |  | 8.6      | 1.15 | * |
| Urambie           | 2       | 8.4          | 1.42 | * | 5.1      | 0.60  | * | 8.1    | 0.75  | * | 7.5      | 1.11  | * | 9.6                | 1.66 | * | 10.3     | 1.69 |   | 8.4    | 0.69  |  | 8.6      | 1.08 | * |
| Wedgetail         | 2       | 9.3          | 1.86 | * | 5.6      | 0.69  | * | 8.0    | 0.54  |   | nc       |       |   | 8.8                | 1.62 | * | 9.8      | 1.42 |   | 8.2    | 0.60  |  | nc       |      |   |
| Strzelecki        | 2       | 8.4          | 1.24 | * | 5.6      | 0.66  | * | 7.6    | 0.54  | * |          |       |   | 10.0               | 1.70 | * | 9.6      | 1.30 |   | 8.5    | 0.74  |  |          |      |   |
| Tobruk            | 2       | 8.0          | 1.24 | * | 4.7      | 0.18  | * | 6.2    | -0.12 |   | 7.6      | 0.97  | * | 10.3               | 1.69 | * | 10.4     | 1.82 |   | 8.6    | 0.79  |  | 9.0      | 1.01 | * |
| Echidna           | 3       | 8.1          | 1.13 | * | 5.2      | 0.39  | * | 6.2    | -0.12 |   | 7.0      | 0.60  | * | 7.7                | 0.93 | * | 9.6      | 1.40 | * | 7.4    | 0.31  |  | 8.7      | 0.84 |   |
| Mannus            | 3       | 7.6          | 0.68 | * | 4.7      | 0.18  | * | 6.5    | 0.13  | * | 7.4      | 0.62  | * | 9.1                | 1.12 | * | 9.6      | 1.44 | * | 7.7    | 0.43  |  | 8.4      | 0.69 |   |
| Gairdner          | 3       | 8.0          | 1.27 | * | 4.9      | 0.42  | * | 7.0    | 0.20  |   | 6.9      | 0.71  | * | 8.4                | 1.15 | * | 10.1     | 1.64 | * | 8.5    | 0.74  |  | 9.1      | 1.05 |   |
| Urambie           | 3       | 8.8          | 1.55 | * | 4.9      | 0.51  | * | 6.3    | 0.48  | * | 6.9      | 0.66  | * | 10.0               | 1.78 | * | 10.0     | 1.55 |   | 7.5    | 0.38  |  | 8.9      | 0.95 |   |
| Wedgetail         | 3       | 8.4          | 1.42 | * | 5.1      | 0.33  | * | 6.6    | 0.27  | * | 7.2      | 0.75  | * | 8.4                | 1.35 | * | 9.0      | 1.01 |   | 7.7    | 0.43  |  | 9.1      | 1.06 |   |
| Strzelecki        | 3       | 8.1          | 1.13 | * | 5.1      | 0.26  | * | 6.5    | 0.17  | * | 5.6      | 0.29  | * | 9.4                | 1.36 | * | 9.3      | 1.12 |   | 8.2    | 0.60  |  | 8.6      | 0.82 |   |
| Tobruk            | 3       | 8.3          | 1.00 | * | 5.1      | 0.10  | * | 5.6    | -0.03 | * | 6.6      | 0.44  | * | 9.8                | 1.42 |   | 9.0      | 1.01 |   | 7.7    | 0.45  |  | 8.4      | 0.69 |   |
| Echidna           | 4       |              |      |   | 4.4      | -0.16 | * | 5.8    | -0.31 | * | 6.6      | 0.25  | * |                    |      |   | 8.9      | 0.95 |   | 6.3    | -0.07 |  |          |      |   |
| Mannus            | 4       |              |      |   | 4.7      | 0.05  | * | 5.5    | -0.50 |   | 6.3      | 0.15  | * |                    |      |   | 9.1      | 1.05 |   | 7.5    | 0.38  |  |          |      |   |
| Gairdner          | 4       |              |      |   | 4.7      | 0.22  | * | 6.4    | -0.03 |   | 6.1      | 0.25  | * |                    |      |   | 9.3      | 1.12 |   | 7.2    | 0.26  |  |          |      |   |
| Urambie           | 4       | nc           |      |   | 5.0      | 0.39  | * | 5.9    | 0.32  | * | 5.3      | 0.05  | * | nc                 |      |   | 9.4      | 1.17 |   | 8.3    | 0.65  |  | nc       |      |   |
| Wedgetail         | 4       |              |      |   | 4.9      | 0.23  | * | 5.6    | 0.11  | * | 7.0      | 0.40  |   |                    |      |   | nc       |      |   |        |       |  |          |      |   |
| Strzelecki        | 4       |              |      |   | 5.5      | 0.37  | * | 5.6    | 0.11  | * | 5.0      | -0.06 | * |                    |      |   | 8.9      | 0.95 |   | nc     |       |  |          |      |   |
| Tobruk            | 4       |              |      |   | 4.7      | 0.07  | * | 5.3    | 0.00  | * | nc       |       |   |                    |      |   | nc       |      |   |        |       |  |          |      |   |

nc = not cut at this harvest due to lodging or early senescence caused by moisture stress. \* Inadequate crude protein content for the level of available metabolisable energy.

**Table S3.** Predicted mean yield (kg DM/ha) at each harvest of cereal and cereal/vetch crops grown in four years at four sites in southern NSW .

| Cereal variety              | Wagga 2008 <sup>1</sup> |      |      | Culcairn 2009 <sup>1</sup> |      |      |      | Temora 2010 <sup>1</sup> |       |       |       | Coolamon 2011 <sup>2</sup> |      |      |      |
|-----------------------------|-------------------------|------|------|----------------------------|------|------|------|--------------------------|-------|-------|-------|----------------------------|------|------|------|
|                             | Harvest                 |      |      | Harvest                    |      |      |      | Harvest                  |       |       |       | Harvest                    |      |      |      |
|                             | 1                       | 2    | 3    | 1                          | 2    | 3    | 4    | 1                        | 2     | 3     | 4     | 1                          | 2    | 3    | 4    |
| <i>Cereal crops</i>         |                         |      |      |                            |      |      |      |                          |       |       |       |                            |      |      |      |
| Echidna                     | 1569                    | 2278 | 2200 | 7080                       | 7810 | 8832 | 9988 | 17569                    | 28019 | 25935 | 27280 | 5007                       | 5531 | 5809 | 4808 |
| Mannus                      | 1914                    | 2624 | 2546 | 4172                       | 5298 | 8700 | 8057 | 20622                    | 19704 | 21567 | 28266 | 4090                       | 5619 | 5943 | 5194 |
| Gairdner                    | 1530                    | 2240 | 2162 | 4258                       | 5458 | 5677 | 6911 | 19263                    | 16222 | 17946 | 31338 | 3402                       | 5970 | 5152 | 4368 |
| Urambie                     | 1815                    | 2525 | 2447 | 4599                       | 5573 | 5624 | 7218 | 10125                    | 16323 | 20102 | 25842 | 2868                       | 4933 | 5928 | 5205 |
| Wedgetail                   | 1414                    | 2124 | 2046 | 6504                       | 7236 | 7861 | 6985 | 13603                    | 21098 | 24852 | 28742 | 3657                       | *    | 3895 | 4562 |
| Strzelecki                  | 1780                    | 2490 | 2412 | 4091                       | 4789 | 5954 | 6353 | 15121                    | 15429 | 22035 | 27950 | 4052                       | *    | 5401 | 6100 |
| Tobruk                      | 1806                    | 2516 | 2438 | 6705                       | 8555 | 8566 | 8280 | 15973                    | 21401 | 30724 | 37718 | 3468                       | 4461 | 5777 | *    |
| <i>Cereal + vetch crops</i> |                         |      |      |                            |      |      |      |                          |       |       |       |                            |      |      |      |
| Echidna                     | 1201                    | 1911 | 1833 | 7377                       | 8381 | 8181 | 8445 | 17215                    | 22968 | 28916 | 29573 | 4571                       | 4250 | 4174 | *    |
| Mannus                      | 1547                    | 2257 | 2179 | 4340                       | 5740 | 7920 | 6384 | 15038                    | 25789 | 17813 | 23207 | 3654                       | 4338 | 4309 | *    |
| Gairdner                    | 1163                    | 1872 | 1794 | 5856                       | 7330 | 6326 | 6669 | 14860                    | 14172 | 24954 | 14472 | 2965                       | 4688 | 3517 | *    |
| Urambie                     | 1448                    | 2158 | 2080 | 5509                       | 6756 | 5584 | 6287 | 10198                    | 12270 | 19575 | 17310 | 2432                       | 3652 | 4293 | *    |
| Wedgetail                   | 1047                    | 1757 | 1679 | 5592                       | 6598 | 6000 | *    | 14470                    | 16578 | 14042 | *     | 3221                       | *    | 2261 | *    |
| Strzelecki                  | 1413                    | 2122 | 2044 | 5919                       | 6891 | 6834 | 6341 | 16132                    | 16196 | 14649 | *     | 3615                       | *    | 3767 | *    |
| Tobruk                      | 1439                    | 2149 | 2071 | 5534                       | 7657 | 6446 | *    | 16563                    | 17578 | 17112 | *     | 3032                       | 3179 | 4143 | *    |

\* No harvest of this treatment

<sup>1</sup> Significant year x variety x vetch x harvest interaction ( $p < 0.001$ ;  $\text{lsd}_{(p < 0.05)} = 3052$ ) for 2008, 2009 and 2010.

<sup>2</sup> Significant variety x harvest ( $p = 0.039$ ;  $\text{lsd}_{(p < 0.05)} = 1251.4$ ) and vetch x harvest ( $p = 0.042$ ;  $\text{lsd}_{(p < 0.05)} = 727.6$ ) interactions for 2011.

**Table S4.** Predicted mean vetch content (g/kg) at each harvest of cereal/vetch crops grown in four years at four sites in southern NSW .

| Cereal variety | Wagga 2008 <sup>1</sup> |       |       | Culcairn 2009 <sup>1</sup> |       |       |       | Temora 2010 <sup>1</sup> |       |       |       | Coolamon 2011 <sup>2</sup> |       |       |
|----------------|-------------------------|-------|-------|----------------------------|-------|-------|-------|--------------------------|-------|-------|-------|----------------------------|-------|-------|
|                | Harvest                 |       |       | Harvest                    |       |       |       | Harvest                  |       |       |       | Harvest                    |       |       |
|                | 1                       | 2     | 3     | 1                          | 2     | 3     | 4     | 1                        | 2     | 3     | 4     | 1                          | 2     | 3     |
| Echidna        | 282.9                   | 298.2 | 306.5 | 392.1                      | 421.5 | 548.6 | 550.5 | 333.6                    | 399.6 | 448.4 | 541.0 | 300.4                      | 319.7 | 378.9 |
| Mannus         | 191.9                   | 207.3 | 215.6 | 454.7                      | 543.8 | 357.6 | 541.8 | 396.1                    | 462.1 | 510.9 | 603.5 | 424.7                      | 274.0 | 394.7 |
| Gairdner       | 319.1                   | 334.4 | 342.8 | 597.4                      | 591.8 | 757.9 | 782.6 | 630.2                    | 696.3 | 745.1 | 837.7 | 277.7                      | *     | 332.1 |
| Urambie        | 166.4                   | 181.7 | 190   | 682.7                      | 495.6 | 878.5 | 763   | 530.6                    | 596.7 | 645.5 | 738.1 | 531.6                      | 624.1 | *     |
| Wedgetail      | 188.8                   | 204.2 | 212.5 | 767.3                      | 783.1 | 724   | *     | 579.4                    | 645.5 | 694.3 | *     | 416.4                      | *     | *     |
| Strzelecki     | 304                     | 319.3 | 327.6 | 775.9                      | 729.2 | 794.6 | 346.6 | 722.3                    | 788.4 | 837.2 | *     | 407.6                      | *     | *     |
| Tobruk         | 216                     | 231.4 | 239.7 | 654.5                      | 721.2 | 741.3 | *     | 601.5                    | 667.5 | 716.3 | *     | 396.7                      | 467.2 | *     |

\* No harvest of this treatment

<sup>1</sup> Significant year x variety interaction ( $p = 0.004$ ;  $\text{lsd}_{(p < 0.05)} = 142.96$ ) and main effect of harvest ( $p < 0.001$ ;  $\text{lsd}_{(p < 0.05)} = 57.54$ ) for 2008, 2009 and 2010.

<sup>2</sup> No significant effect of variety, harvest or variety x harvest on vetch content.

**Table S5.** Crude protein content (g/kg) at each harvest of cereal and cereal/vetch crops grown in four years at four sites in southern NSW .

| Cereal variety              | Wagga 2008 <sup>1</sup> |       |       | Culcairn 2009 <sup>1</sup> |       |       |       | Temora 2010 <sup>1</sup> |       |       |       | Coolamon 2011 <sup>2</sup> |       |       |      |
|-----------------------------|-------------------------|-------|-------|----------------------------|-------|-------|-------|--------------------------|-------|-------|-------|----------------------------|-------|-------|------|
|                             | Harvest                 |       |       | Harvest                    |       |       |       | Harvest                  |       |       |       | Harvest                    |       |       |      |
|                             | 1                       | 2     | 3     | 1                          | 2     | 3     | 4     | 1                        | 2     | 3     | 4     | 1                          | 2     | 3     | 4    |
| <i>Cereal only crops</i>    |                         |       |       |                            |       |       |       |                          |       |       |       |                            |       |       |      |
| Echidna                     | 129.5                   | 108.7 | 116.6 | 69.8                       | 60.0  | 61.3  | 49.8  | 97.3                     | 76.2  | 72.8  | 56.9  | 105.3                      | 95.5  | 89.5  | 85.4 |
| Mannus                      | 139.7                   | 107.2 | 103.5 | 78.1                       | 62.5  | 54.2  | 54.2  | 117.9                    | 81.7  | 80.8  | 67.2  | 116.2                      | 84.4  | 97.1  | 77.2 |
| Gairdner                    | 168.5                   | 130.4 | 114.5 | 85.4                       | 63.5  | 57.3  | 53.5  | 133.0                    | 114.4 | 122.1 | 96.0  | 131.3                      | 94.8  | 89.2  | 75.6 |
| Urambie                     | 181.2                   | 121.2 | 128.5 | 83.8                       | 63.1  | 60.4  | 59.0  | 141.2                    | 122.4 | 90.2  | 87.1  | 123.8                      | 100.2 | 88.8  | 62.1 |
| Wedgetail                   | 173.1                   | 139.7 | 123.1 | 69.4                       | 69.0  | 59.4  | 56.7  | 132.1                    | 112.7 | 86.5  | 73.8  | 117.1                      | *     | 95.6  | 90.6 |
| Strzelecki                  | 136.2                   | 119.9 | 116.4 | 98.3                       | 74.8  | 59.6  | 65.0  | 127.8                    | 105.7 | 87.7  | 75.6  | 113.4                      | *     | 74.1  | 58.5 |
| Tobruk                      | 129.5                   | 108.7 | 116.6 | 71.5                       | 54.0  | 59.0  | 53.3  | 128.8                    | 90.2  | 61.4  | 63.0  | 120.4                      | 105.4 | 82.5  | *    |
| <i>Cereal + vetch crops</i> |                         |       |       |                            |       |       |       |                          |       |       |       |                            |       |       |      |
| Echidna                     | 154.1                   | 135.4 | 106.6 | 167.3                      | 116.5 | 140.6 | 146.5 | 163.4                    | 161.1 | 154.1 | 128.5 | 137.0                      | 119.3 | 136.3 | *    |
| Mannus                      | 189.1                   | 150.6 | 135.6 | 177.7                      | 176.9 | 139.6 | 134.4 | 184.0                    | 166.6 | 162.1 | 138.9 | 148.0                      | 108.3 | 143.9 | *    |
| Gairdner                    | 171.6                   | 127.2 | 123.1 | 212.1                      | 172.7 | 147.9 | 156.5 | 199.0                    | 199.3 | 203.3 | 167.6 | 163.1                      | 118.7 | 136.0 | *    |
| Urambie                     | 180.2                   | 138.3 | 148.9 | 215.4                      | 190.0 | 175.6 | 160.8 | 207.3                    | 207.4 | 171.5 | 158.8 | 155.6                      | 124.1 | 135.5 | *    |
| Wedgetail                   | 212.6                   | 133.7 | 122.2 | 201.7                      | 172.5 | 138.3 | *     | 198.1                    | 197.7 | 167.7 | *     | 148.8                      | *     | 142.3 | *    |
| Strzelecki                  | 174.5                   | 148.9 | 138.7 | 200.8                      | 181.0 | 153.5 | 179.5 | 193.9                    | 190.6 | 169.0 | *     | 145.2                      | *     | 120.8 | *    |
| Tobruk                      | 182.2                   | 159.3 | 153.7 | 191.0                      | 162.9 | 166.5 | *     | 194.9                    | 175.2 | 142.6 | *     | 152.1                      | 129.3 | 129.3 | *    |

\* No harvest of this treatment

<sup>1</sup> Significant year x variety x vetch x harvest interaction ( $p = 0.008$ ;  $\text{lSD}_{(p < 0.05)} = 25.42$ ) for 2008, 2009 and 2010.

<sup>2</sup> Significant variety x harvest ( $p = 0.014$ ;  $\text{lSD}_{(p < 0.05)} = 17.79$ ) and vetch x harvest ( $p = 0.042$ ;  $\text{lSD}_{(p < 0.05)} = 10.34$ ) interactions for 2011.

**Table S6.** Digestible organic matter content (g/kg) at each harvest of cereal and cereal/vetch crops grown in four years at four sites in southern NSW .

| Cereal variety              | Wagga 2008 <sup>1</sup> |       |       | Culcairn 2009 <sup>1</sup> |       |       |       | Temora 2010 <sup>1</sup> |       |       |       | Coolamon 2011 <sup>2</sup> |       |       |       |
|-----------------------------|-------------------------|-------|-------|----------------------------|-------|-------|-------|--------------------------|-------|-------|-------|----------------------------|-------|-------|-------|
|                             | Harvest                 |       |       | Harvest                    |       |       |       | Harvest                  |       |       |       | Harvest                    |       |       |       |
|                             | 1                       | 2     | 3     | 1                          | 2     | 3     | 4     | 1                        | 2     | 3     | 4     | 1                          | 2     | 3     | 4     |
| <i>Cereal only crops</i>    |                         |       |       |                            |       |       |       |                          |       |       |       |                            |       |       |       |
| Echidna                     | 828.2                   | 763.4 | 749.3 | 812.2                      | 784.7 | 760.1 | 664.0 | 664.7                    | 606.9 | 566.6 | 546.9 | 837.2                      | 775.5 | 716.2 | 647.4 |
| Mannus                      | 809.1                   | 734.8 | 695.5 | 829.4                      | 774.1 | 731.2 | 689.9 | 716.3                    | 644.5 | 611.5 | 526.5 | 819.8                      | 758.1 | 698.8 | 629.9 |
| Gairdner                    | 818.2                   | 789.4 | 769.8 | 848.7                      | 803.8 | 792.8 | 750.2 | 665.6                    | 633.8 | 610.4 | 568.6 | 859.6                      | 797.8 | 738.6 | 669.7 |
| Urambie                     | 828.4                   | 773.0 | 783.2 | 859.1                      | 827.1 | 820.5 | 776.0 | 744.8                    | 692.6 | 708.3 | 688.5 | 848.2                      | 786.5 | 727.2 | 658.4 |
| Wedgetail                   | 821.8                   | 799.8 | 775.0 | 852.0                      | 813.8 | 745.1 | 737.5 | 709.9                    | 661.6 | 644.0 | 644.7 | 859.5                      | 797.8 | 738.5 | 669.6 |
| Strzelecki                  | 828.3                   | 755.9 | 744.5 | 847.6                      | 806.1 | 724.0 | 728.3 | 692.8                    | 673.7 | 625.2 | 639.6 | 839.7                      | 778   | 718.7 | 649.8 |
| Tobruk                      | 810.5                   | 769.9 | 726.0 | 797.4                      | 733.0 | 676.4 | 699.2 | 687.5                    | 566.3 | 606.6 | 624.2 | 814.6                      | 752.9 | 693.6 | 624.7 |
| <i>Cereal + vetch crops</i> |                         |       |       |                            |       |       |       |                          |       |       |       |                            |       |       |       |
| Echidna                     | 808.4                   | 767.7 | 740.4 | 784.0                      | 749.8 | 747.7 | 692.7 | 666.7                    | 657.6 | 628.5 | 567.2 | 758.3                      | 727.9 | 698.5 | *     |
| Mannus                      | 800.8                   | 737.0 | 714.2 | 820.1                      | 768.5 | 749.8 | 703.3 | 713.3                    | 670.0 | 630.8 | 617.5 | 740.9                      | 710.5 | 681.1 | *     |
| Gairdner                    | 826.4                   | 774.6 | 743.2 | 780.5                      | 742.1 | 760.3 | 713.5 | 701.1                    | 663.0 | 677.0 | 619.8 | 780.7                      | 750.3 | 720.8 | *     |
| Urambie                     | 835.7                   | 769.3 | 770.5 | 789.8                      | 765.2 | 748.2 | 713.2 | 726.3                    | 686.7 | 636.0 | 659.7 | 769.4                      | 738.9 | 709.5 | *     |
| Wedgetail                   | 834.2                   | 789.4 | 767.5 | 761.3                      | 739.9 | 693.9 | *     | 690.3                    | 668.7 | 638.6 | *     | 780.6                      | 750.2 | 720.8 | *     |
| Strzelecki                  | 822.3                   | 765.3 | 740.1 | 753.4                      | 734.0 | 708.9 | 684.3 | 696.0                    | 683.7 | 650.0 | *     | 760.8                      | 730.4 | 701   | *     |
| Tobruk                      | 805.8                   | 754.6 | 730.8 | 765.3                      | 771.4 | 702.3 | *     | 699.5                    | 671.3 | 631.3 | *     | 735.7                      | 705.3 | 675.9 | *     |

\* No harvest of this treatment

<sup>1</sup> Significant year x variety x vetch x harvest interaction ( $p = 0.049$ ;  $\text{lsd}_{(p < 0.05)} = 51.68$ ) for 2008, 2009 and 2010.

<sup>2</sup> Significant main effect of vetch ( $p < 0.001$ ;  $\text{lsd}_{(p < 0.05)} = 27.44$ ) and harvest ( $p < 0.001$ ;  $\text{lsd}_{(p < 0.05)} = 31.72$ ).
